# Supplementary material for: Direct cyanomethylation of aliphatic and aromatic hydrocarbons with acetonitrile over a metal loaded titanium oxide photocatalyst
Source: Royal Society of Chemistry journal article supplement (doi:10.1039/c7cy00365j), 2017-01-01
Supplement: c7cy00365j1.pdf [file c7cy00365j1.pdf]

SUPPLEMENTARY INFORMATION

**Direct cyanomethylation of aliphatic and aromatic hydrocarbons with acetonitrile over metal loaded titanium oxide photocatalysts**

Emiko Wada,<sup>a,b</sup> Tomoaki Takeuchi,<sup>a</sup> Yuki Fujimura,<sup>c</sup> Akanksha Tyagi,<sup>a</sup> Tatsuhisa Kato<sup>a,d</sup>  
and Hisao Yoshida<sup>\*a,e</sup>

<sup>a</sup> Graduate School of Human and Environmental Studies, Kyoto University, Yoshida Nihonmatsu-cho, Sakyo-ku, Kyoto 606-8501 Japan

E-mail: yoshida.hisao.2a@kyoto-u.ac.jp

<sup>b</sup> Research Fellow of the Japan Society for the Promotion of Science

<sup>c</sup> Department of Applied Chemistry, Graduate School of Engineering, Nagoya University, Furo-cho, Chikusa-ku, Nagoya, 464-8603, Japan.

<sup>d</sup> Institute for Liberal Arts and Science, Kyoto University, Yoshida Nihonmatsu-cho, Sakyo-ku, Kyoto, 606-8501, Japan

<sup>e</sup> Elemental Strategy Initiative for Catalysts and Batteries (ESICB), Kyoto University, Kyotodaigaku-katsura, Nishikyo-ku, Kyoto, 615-8520, Japan

**List of contents**

**Table S1** The C–H bond dissociation energies in various organic compounds.

**Table S2** The cyanomethylation of n-hexane with acetonitrile over the M/TiO<sub>2</sub> photocatalyst.

**Fig. S1** The mass fragments of a standard material and the main product from cyanomethylation of cyclohexene.

**Table S3** Adsorbed amount of CO on the samples, metal dispersions, and metal particle sizes.

**Table S1** The C–H bond dissociation energies in various organic compounds. <sup>a</sup>

| Compounds                | C–H bonds                                                                         | Bond dissociation energy /kJ mol <sup>-1</sup> |
|--------------------------|-----------------------------------------------------------------------------------|------------------------------------------------|
| acetonitrile             | H–CH <sub>2</sub> CN                                                              | 406                                            |
| cyclohexane              | H–C <sub>6</sub> H <sub>11</sub>                                                  | 416                                            |
| n–hexane                 | 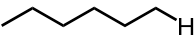 | 414                                            |
|                          | 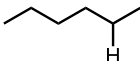 | 410                                            |
|                          | 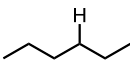 | 415                                            |
|                          | 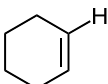 | 457                                            |
|                          | 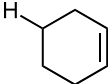 | 415                                            |
| cyclohexene <sup>b</sup> | 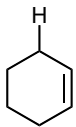 | 350                                            |
|                          |                                                                                   |                                                |
| benzene                  | H–C <sub>6</sub> H <sub>5</sub>                                                   | 440                                            |

<sup>a</sup> These values except cyclohexene were cited from ref. S1. <sup>b</sup> The values of cyclohexene were cited from ref. S2.

**Table S2** Results of the photocatalytic reaction tests for the cyanomethylation of n-hexane with acetonitrile over a M/TiO<sub>2</sub> photocatalyst. <sup>a</sup>

$$\text{C}_6\text{H}_{14} + \text{CH}_3\text{CN} \xrightarrow[\text{M/TiO}_2]{h\nu} \text{C}_6\text{H}_{13}\text{CH}_2\text{CN} + \text{H}_2$$

---

Products:

Succinonitrile  
(SN)

(1)

(2)

(3)

---

| Entry | Catalyst            | Products /μmol |      |      |      | C <sub>12</sub> H <sub>26</sub> | H <sub>2</sub> |
|-------|---------------------|----------------|------|------|------|---------------------------------|----------------|
|       |                     | SN             | 1    | 2    | 3    |                                 |                |
| 1     | Pt/TiO <sub>2</sub> | 6.2            | 0.29 | 0.81 | 1.0  | n.d. <sup>b</sup>               | 70             |
| 2     | Pd/TiO <sub>2</sub> | 2.9            | 0.12 | 0.49 | 0.54 | n.d.                            | 35             |

<sup>a</sup> Reaction conditions: M/TiO<sub>2</sub> catalyst 0.2 g, n-hexane 0.76 mmol (0.1 mL), water 5.6 mmol (0.1 mL), acetonitrile 74.7 mmol (3.9 mL). Reaction time was 1 h. Reaction temperature was ca. 310 K. The wavelength of irradiation was 365±20 nm and the intensity was 27mW cm<sup>-2</sup> measured at 360±15 nm. <sup>b</sup> not detected.

The cyanomethylation of n-hexane with acetonitrile was also examined with the Pd/TiO<sub>2</sub> and Pt/TiO<sub>2</sub> samples (Table S2). The cyanomethylated products were obtained in the presence of these photocatalysts, and the Pt/TiO<sub>2</sub> sample gave the products in higher yield than the Pd/TiO<sub>2</sub> sample. Among cyanomethylated products, the compound **2** and **3** were obtained more than the compound **1**. The cyanomethylation at the primary carbon less proceeded because the primary carbon radical species would be rather unstable compared to the secondary and tertiary carbon radical species. However, the product selectivity was not so clear because of the small difference in the C–H bond dissociation energy as shown in Table S1.

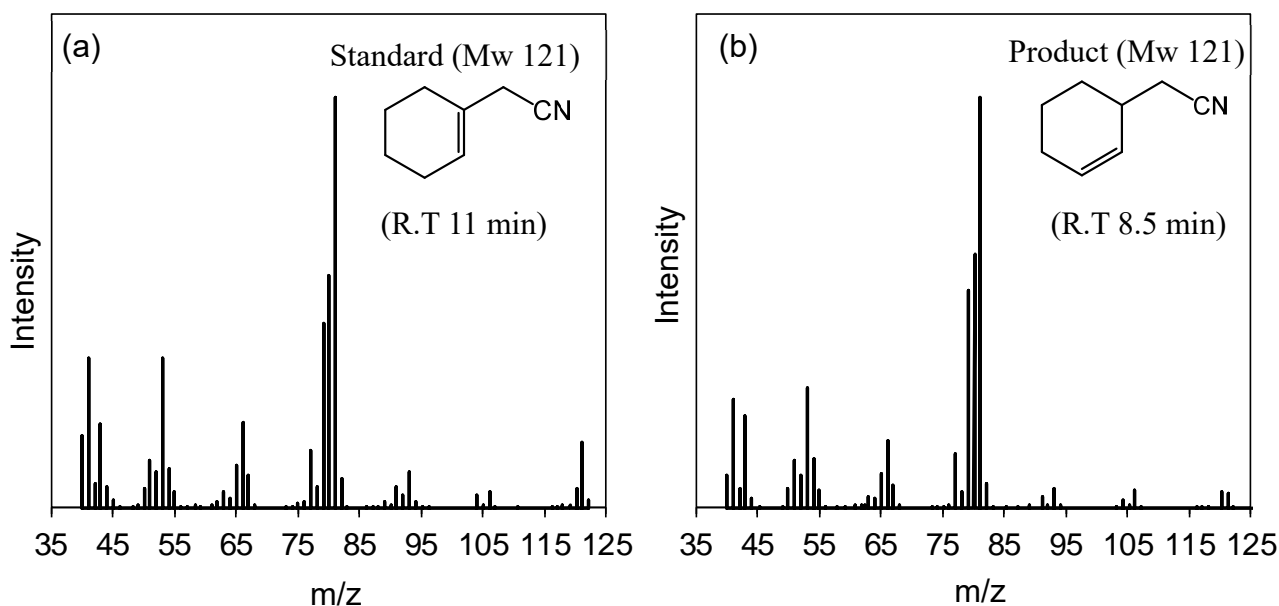

**Fig. S1** GC-Mass fragments of (a) the standard compound and (b) the product obtained from the direct cyanomethylation of cyclohexene with acetonitrile over the Pt/TiO<sub>2</sub> sample.

**Table S3** Adsorbed amount of CO on the samples, metal dispersions, and metal particle sizes.<sup>a</sup>

| Entry | Catalysts                                           | Adsorbed amount<br>/ $\mu\text{mol g}^{-1}$ | Metal dispersion<br>(%) | Particle size /nm |
|-------|-----------------------------------------------------|---------------------------------------------|-------------------------|-------------------|
| 1     | Pt(0.1)/TiO <sub>2</sub>                            | 2.8                                         | 54                      | 2.1               |
| 2     | Pd(0.1)/TiO <sub>2</sub>                            | 4.8                                         | 50                      | 2.2               |
| 3     | Pd(0.1)/Al <sub>2</sub> O <sub>3</sub>              | 2.7                                         | 28                      | 3.9               |
| 4     | Pd(1.0)/Al <sub>2</sub> O <sub>3</sub>              | 45.9                                        | 49                      | 2.3               |
| 5     | Pd(2.0)/Al <sub>2</sub> O <sub>3</sub> <sup>b</sup> | 45.6                                        | 24                      | 4.6               |

<sup>a</sup> The catalyst samples used was 50 mg. As a pretreatment, metal loaded TiO<sub>2</sub> samples were reduced at 473 K, while metal loaded Al<sub>2</sub>O<sub>3</sub> samples were reduced at 673 K. Metal dispersion and particle size were calculated from the adsorption amount of CO.

<sup>b</sup> After the reduction, the sample was kept in argon atmosphere at 673 K for 40 min, and then cooled down to room temperature in argon atmosphere.

## Reference

- [S1] Y-R. Luo, *Handbook of bond dissociation energies in organic compounds*, CRS press, 2007.  
 [S2] Z. Tian, A. Fattahi, L. Lis, and S.R. Kass, *J. Am. Chem. Soc.*, 2006, **128**, 17087.
